# Supplementary material for: Inhibition of miR-199b-5p reduces pathological alterations in Osteoarthritis by potentially targeting Fzd6 and Gcnt2
Source: bioRxiv preprint, doi:10.1101/2023.10.03.560693, version 2 (2024-01-30)
Supplement: supplement file8 [file 560693_file19.docx]

>mmu-miR-199b-5p MIMAT0000672

CCCAGUGUUUAGACUACCUGUUC

UGUGACC ACACTGG

UGUGAC ACACTG

GUGACC CACTGG

Mus musculus frizzled class receptor 6 (Fzd6), transcript variant 1, mRNA

NCBI Reference Sequence: NM_008056.3

AGAAAACTGTCTCGTTCCCCCAGAAGCACATGTATGTTACACTGGAGATGACCAACTGATTTGTCTTATAAAGGCCACTGTTGAGCTGGGAGAGTAGCCCAGTGGTACAGCGCCCACCTGGAATACTTGAGGACCTGGGGTTGTCTCCCAGCACTGCAAAAGGAAAATTCACTGTTACAGTCTTCCTTGCACTTAAACCAGCTTTGTCTATTGTTTTTTTGGTTTGGCTTTTATTTTTGTTGCTGTTATTTTTGTTGTTGTTTGTTTGTTTTTTTGTTTGTTTGTTTGAGACAGGGTTTCTTTGCTAGCCCTGACTGTCCTGAAACTCCCTCTGTAGACCAGGCTGGCCTCAAACTTACAGAGATCTGCCTGCCTCAGCCTCCCGAGTGCTGGGAATAATGGTGTGGTCACCACTGCCCAGCCTTTTGTCTGTTTTTAAACTTGAAAGAAACAACAGCCCAGATTTCAAAAATAATATAATGCATTTATACCTAAAAAACCAACCAGGAGTGCCCAGTTAATAACACTTTTTAAATGTGGGGATGGGAAGGGCATTAGAGGAGTCTTCCTTCTATTGAAGATTCATTAAAGTATTTTAAGATATGCTCTTTCACTCTTTATATAAATCCAAGATTTTTCTTTGCTGAAGTATTTAAAACTTTTGTACCTTTATATGTAGATATGAATTTGAAAATATGCTTATGTGTATTTGAACTTTTGAAAATCCTAGAGAATTGAATCAAATATTTTTATGATGTTTTTCTACTATTTTAGCTACTTTGCGACTGTGATAGCTGTTACACTGGATTTTTAAAAAACTTGTACAGCAGCCTCTTTACAGTAAAAAGAGTGGGTGTCACACTGAAAGGTCTGTAAGAAGTGGTCACAGCCACCCCTACCTTCCCCAAAAGGAGGAACTTGGTGGCAGGTCCCTCCCTGATTGGACTGTCCCTTTCTTTCTGCATGTTATAAATCAGCAGGTAAGATGGTAGGTTTTTACAAGTTAGGCCGAGCTGTCGATTCCCCTTTTAAGTGTTGAATTAGGATTGAATTATGGCCATTTGTAGTTGCTCGTGCCTGTCTTTATTTTAGTATTTTATTTCCCGAGACAGGAACTCACTGTGTGGTGCTCCTTGGCTGTCTGGTGTTCAGTCTGTCCCAGGCAGGTCACAGAGATCTCCCCCTCTGCAGCCCACTCATCTCTCCCAAGCCACCACACTCAGCTTTTATCTGTTTTAAAAATTTAAACTTAAAAAAATGTTTTTGGAATAGTACAAACACATTGTGTTGTAAATTTCTTTGATGCTATGCAAAATTCCTATCTGCATCTAAGCCTGCAAAAGAAAATGTGCGAAGGGCAGAGTCAGAGTTGGGCAGGAAGAGTGTAGTGCAGCAGATGCAGCGTGAAGACACTGAAGGTGCTAAGACAGCGTCTCAGTGCTGGTCCTCCTTAAGGATTATCTCGCCAGCGAGGTTTTCTTAGATACTTTGATCCCATTGGAGCTCTGTTAAAGTTTAAAATGAAAATTATCATGTACTGTATGGGAAATGTAAATACTAACTTTTCCACATATGTAAACTTCAGACACAAATTTTTTTGTGTGTTCTTTTCATCAATAAAATTTTCTTTGTATAAAAAAA

拼接序列：

AGAAAACTGTCTCGTTCCCCCAGAAGCACATGTATGTTACACTGGAGATGACCAACTGATTTGTCTTATAAAGGCCACTGTTGAGCTGGGAGAGTAGCCCAGTGGTACAGCGCCCACCTGGAATACTTGAGGACCTGGGGTTGAATTGAATCAAATATTTTTATGATGTTTTTCTACTATTTTAGCTACTTTGCGACTGTGATAGCTGTTACACTGGATTTTTAAAAAACTTGTACAGCAGCCTCTTTACAGTAAAAAGAGTGGGTGTCACACTGAAAGGTCTGTAAGAAGTGGTCACAGCCACCCCTACCTTCCCCAAAAGGAGGAACTTGGTGGCAGGTCCCTCCCTGATTGGACTGTCCTATCTGCATCTAAGCCTGCAAAAGAAAATGTGCGAAGGGCAGAGTCAGAGTTGGGCAGGAAGAGTGTAGTGCAGCAGATGCAGCGTGAAGACACTGAAGGTGCTAAGACAGCGTCTCAGTGCTGGTCCTCCTTAAGGA

>hsa-miR-199b-5p MIMAT0000263

CCCAGUGUUUAGACUAUCUGUUC

NCBI Gene ID 8323 GenBank Accession NM_001164615

Gene Symbol FZD6 3' UTR Length 1368

Gene Description frizzled class receptor 6

3' UTR Sequence ：agaacattttctctcgttactcagaagcaaatttgtgttacactggaagtgacctatgcactgttttgtaagaatcactgttacattcttcttttgcacttaaagttgcattgcctactgttatactggaaaaaatagagttcaagaataatatgactcatttcacacaaaggttaatgacaacaatatacctgaaaacagaaatgtgcaggttaataatatttttttaatagtgtgggaggacagagttagaggaatcttccttttctatttatgaagattctactcttggtaagagtattttaagatgtactatgctattttacttttttgatataaaatcaagatatttctttgctgaagtatttaaatcttatccttgtatctttttatacatatttgaaaataagcttatatgtatttgaacttttttgaaatcctattcaagtatttttatcatgctattgtgatattttagcactttggtagcttttacactgaatttctaagaaaattgtaaaatagtcttcttttatactgtaaaaaaagatataccaaaaagtcttataataggaatttaactttaaaaacccacttattgataccttaccatctaaaatgtgtgatttttatagtctcgttttaggaatttcacagatctaaattatgtaactgaaataaggtgcttactcaaagagtgtccactattgattgtattatgctgctcactgatccttctgcatatttaaaataaaatgtcctaaagggttagtagacaaaatgttagtcttttgtatattaggccaagtgcaattgacttcccttttttaatgtttcatgaccacccattgattgtattataaccacttacagttgcttatattttttgttttaacttttgttttttaacatttagaatattacattttgtattatacagtacctttctcagacattttgtagaattcatttcggcagctcactaggattttgctgaacattaaaaagtgtgatagcgatattagtgccaatcaaatggaaaaaaggtagttttaataaacaagacacaacgtttttatacaacatactttaaaatattaaggagttttcttaattttgtttcctattaagtattattctttgggcaagattttctgatgcttttgattttctctcaatttagcatttgcttttggtttttttctctatttagcattctgttaaggcacaaaaactatgtactgtatgggaaatgttgtaaatattaccttttccacattttaaacagacaactttgaatacaaaaactttgttttgtgtgatcttttcattaataaaattatctttgtataagaaaaaaaaaaaaaa

>mmu-miR-199b-5p MIMAT0000672

CCCAGUGUUUAGACUACCUGUUC

UGUGACC ACACTGG

UGUGAC ACACTG

GUGACC CACTGG

Mus musculus glucosaminyl (N-acetyl) transferase 2, I-branching enzyme (Gcnt2), transcript variant 1, mRNA

NCBI Reference Sequence: NM_008105.3

CCCGCAGCAGCTCGGGCCTAAATGGAAATTGAAGACGTAAAGAAGAGCTTTCTTTTCCAAGAGACTCTGGTCTTGGCTATGCTGAAGACTTTTTTAAAAAATGGTTTTCAGGGAACCGTGAGGATCTGGCAACATGGCTCTGCTTGCAATATCCACTGAGCACTGTAATACATTTGACAGGATGGCTGCATGAAACTGTCCAGCATTTTTCTGTCGTTTCCCCCCCACCCCAAATCCTTTTTTTCTCTTCTTTTTTAAAAGATAGGTAGGGTCTTGCTAGATATCTCTAGCAAGCCTGTTTCTTGTCAGGTAGCCCAGGATGGCCTTGAACTCTTAATCCTCCGCCTTGGCCCTCTAAGGGCTGCTAGTCCGAGTGTGGACAACCACACCTGGCTCTGGCGTCTGGCGGTCACTTGACGCTCATCTGCGTCTCCGTCTGCTAGGTGGTCGGTGATAAATTCAAATGTATCAGATCTCTGTGCCAGATACTCATATTAGTATACCCTGTTCAAAGGAGAATGGTGGATAATACTGTCTGAGGAAATCAGAACTTATTTGAGAAGGAAGCTCTCGTTCCACATTCCTAGCAACTATATTCTCAGGCACACATAGGCGCACAGAGACAGCTTCCTAGTAACTCACATCAATTTCGTTTAATACAAACTGATCCTGAAGAGCTGAGGAACTATGTAAGTTCAGTGTCCAAGCATTTGACTGACATTTGTGCAGAGTTAGGTTCCATCTCCAGCATCACGCACGGGTCTTGTGAACACCGACATCTTCAGTTTACTTGTGTCTGCAGTTCTGTGGACAGAACAAAGCCATTCACAAGTGACCGACAGCACGTGCCGTGAGACGGGAGGTGGCTGCAGGAAGAGGATGCCTCAGGGATGCCGGACATTTCCGTGTTCTATTCCAGAGTGTTCTCTTCTCCCAGAGAACACTGGAACGTCCTCACAGGGATGAAGGAATTCTTTCTTTCCCACAGGAAAGGTGCTACTGTGTGGGTCTGGAACCTGTGAATGAATCACTCCTGGGGTTTCGTTTCTATGTGAGAGACGGGGACCCGGTTCTGTTGTGTGCAGCTTTAGCGGCATCAGGACAGCTTCCAGCTTGCAATGATTGCTGCTGACAGGAACACCTGGATCTCAAGAGCTTTTTATGACAGGTGGACATCTGTGTCATTTTTCCTTGTTCCCTCATCCATCCATCCATCCATCCATCCATCCATCCATCCATCCATCCATTCGTCAGCCTACATTCAACAAACGCCTCTTGAATGTCTATGATTCCCCCAGACACATGCTGACAGACACGAGGGAAGCAAGACAGATTCTTTCTCCACTGTTAAACTCTGGGGAGTGGTATCAGCTTTTGAAACCCTGCTCTAGACTCTTACAAAATGGCTACACTTAGCACATACTCTGCCCTGGCTATATATTATATTGGGCCATAGAGATCAGCAATGTATCAATTAATAGATTAATCCAGAGACAGGAAGGAGGAAACGAAAGCTAGAGCCTCTTTGTGACTCCACCAACTCCTTCTTGTCTCCTTTTATTGAAGAGTCCGCACACATACTCACCCCTCTGGTGGGCCACATGAGGACCTGCATCTTGCAGATGATGTAGCAAGCCTTAGGATGGTTCATGATCAGTAGGAAGCAAATTCTAAGACCTCAGGGTGTCTTTCTGAGTCTCTCATTTCTTTAGGGATGTGGAGAGAAGATGAAGTATAGCCGTGTGTAGTGTCGCCAGAGAAGGTGGAGTTTAAGAATGGTCTCAGTGTTATTAATGAGAAAAAGTTCTGTCATTCAGGAAAAAAAAGCAAAAAACGTGAGGTTGGGACTCAGTAGGTGAGGGTGCTTGCAGCCAAACCTGATGACCTGCATTCAATTCCTGGGTCCCACGGGACAGAGGGAGAGAGTCCACTACTGAAAGGAACGCTCAAACCTCCTCACACAGGTCCTTGTGCCTGGGCACTCCCCCGCCCCATATGCATACACACATACATGCTTTTGTGATTTTTTTTATTAGTGCTTTTACATTTAGAAATATTTATTTATTCTAGCAGGGAAAAAACCCCACATGCTTTAAATGATGTCACTTTCCACAACTTCATTCTTGTGCTGTCATTGGACTGAATGTTATGCATCTTTAAAGGGAATCACTTCGTGTAAAACTCTCTTGTCTCTTCTGCTGAAAAGTAAAATGGGTTGTGTCGGGTAATAAAGGGTCGAGGGGTAGGAAGCACTTGGTCAAGGCGAAGTCTAAAACCGGTCTCTTTTTTATTTGTTACTTGGATGAGAGCACCTGAAGACTAATGTTTTACACTGGATTGAGATCTCATGGAAAATGAAACATTCTTTTTCTGGAGAAGTTTACATGCCCATTGTTGGTCACCTCTTTACTGTAAATACTATTGAAAAAAGGAGCGTAGCATTTGCATAGCAGGGATTGTGCCTGTATCTACTGTGTCCATTTTGTTTTTTCGGATGTTTTCTGGTTTTGTTTCCTTGGAAATAAATTAATATATTGTTTTCCACCTTCAAAAAAAAAAAAAAAAAAA

拼接序列：

AGTTCTGTGGACAGAACAAAGCCATTCACAAGTGACCGACAGCACGTGCCGTGAGACGGGAGGTGGCTGCAGGAAGAGGATGCCTCAGGGATGCCGGACATTTCCGTGTTCTATTCCAGAGTGTTCTCTTCTCCCAGAGAACACTGGAACGTCCTCACAGGGATGAAGGAATTCTTTCTTTCCCACAGGAAAGGTGCTACTGTGTGGGTCTGGAAAACTCTCTTGTCTCTTCTGCTGAAAAGTAAAATGGGTTGTGTCGGGTAATAAAGGGTCGAGGGGTAGGAAGCACTTGGTCAAGGCGAAGTCTAAAACCGGTCTCTTTTTTATTTGTTACTTGGATGAGAGCACCTGAAGACTAATGTTTTACACTGGATTGAGATCTCATGGAAAATGAAACATTCTTTTTCTGGAGAAGTTTACATGCCCATTGTTGGTCACCTCTTTACTGTAAATACTATTGAAAAAAGGAGCGTAGCATTTGCATAGCAGGGATTGTGCCT

>hsa-miR-199b-5p MIMAT0000263

CCCAGUGUUUAGACUAUCUGUUC

NCBI Gene ID 2651 GenBank Accession NM_001491

Gene Symbol GCNT2 3' UTR Length 2780

Gene Description glucosaminyl (N-acetyl) transferase 2 (I blood group)

3' UTR Sequence:

gctattcatgagctactcatgactgaagggaaactgcagctgggaagaggagcctgtttttgtgagagacttttgccttcgtaatgttaaccgtttcaggaccacgtttatagcttcaggacctggctacgtaattatacttaaaatatccactggacactgtgaaatacactaacaggatggctgggtagagcaatctgggcactttggccaattttagtcttgctgtttcttgatgctcacctctatattagtttattgttaggatcaatgataaatttaaatgacctcagatctttgcaccagatactcatcatatacaaatgttttagtaaaaaagagaattgtagataatactgtctaggaaaataagaattaggtttctttgaagaaggaatcttttataacaccttaacagtcaccactgtgctcaaccagacagatagtgaaacagctttctgggtaattcaccaatttcctttaaaacataagctacctgaatggagaatacatcttgtttctgagtttcaacactagcatttttggcttactcatggacaaagttctgtatatagtataaagtcattaacaagaaacaggatatgctttaagacagaattcactgtctgttgcttcagtaaaaggacctcggggaataaaacatttctctcttatatgccagaatgtaggctggtccctatgtcatgtcttccattaagaacactaaaaagtccttgcaagaatggagatatgcattcaagagaggtgctatcacatagatctagtctgaagtctggaacactttcctcttctatgacccctctctccccagtattatcttacttgcaaaatggagaccaaattctatcctgtgaggcttttaattgcaccatagtatgctctgagtagctttacactgcctggtactgatagtagtggctcgatttttaagagccttcaattgtagatgaacatctctgttatttatccctcattcatccatccgttcattcattcagccttcaatcaacatctcttgagtgtctattatgtacaggacatgtactgagacaaaaaggaaacataagagctttttcactctaaaaatcttggcaataatgtcaacaccagaaagcctcctctggagaatcttacagagtgattgtagtttaatacaggaacacacagggctgtgtagcatgataccaggcccaggagatcagtaattacaaattaagggttaaatcagagattattcaacagagagggagaaaggaggagacagagggaggacctgttgtgttccagccattctggtattcctttatgtatctaatttcattcaaacctcacaacagtcttgtgaggcccttatataattactcccattttgcagatgaagtaactgaggcttagaaaggttaatagcaccggggaacaatttctctgggtgagaattgggactctgttgctggtcttctcagttcatttcctgaggtggatttactgagagaaggtgaaataaagccatatttagtataccagagaaggtagattttaagaatggtctcagtgttaatactgagaaaaagtcctgtcagttcagaaaaaatgtgaagtctactttagtattcctgtaatactaaaccgttgagtttctaaatatttatttattctaacaaaaagcaattactacaaatggatgacacatttaatgaacacaattttattttttttctgtaactgtgcttgttgaatgtcaatcatatttaaagggaatgactttgaagtaaaaccttttttcttgctactgaaaaaaatggagttgttttgggtggtaaagtgttaaggaatagggacagctggtcacacaaggaactcttgaaggccacatgtgaaaacctgtcacttgcacagaggccagtcccactaaggtgaccagagtgggctccaagcacaaactgccattggctatagatgggactgtgtccccccaaaattcatgtgttggagccttaaccctcaatgtgatggtatttgagatggggcctttggtaagggaagtttagatgaggtcacgagggtaggaccctcatgatgggatgagtccccttacaagacctctggcttgggccgggcgtggtggctcacacctgtaatcccaacactttgggaggccaaggcaggtagatcacttgatgccaggagttccagaccaggctggccgacatggtgaaaccccatctctactaaaaaatataaaaattagccgggctttgtggcatgtgcctgtaatcccagctatttggcaggctgaggcatgagaatcgcttgaacccaggaggtggaggttacagtgagctgagagtgccccactgcactccagcctgggtgacagagcgagactttgtcccaaaacaaaataggtgaggggatagcgaatgcactcagggtcagcagtggagtttaaaaattgtctcttttcaacttatttaaatgacagcacctgagaagaggaaccgttttacactggatgtttctcatgtagaacaagaaatctttctggaattgatgtttacatgtctgttgttggtcatctctcctgtgtcttaaatactttaatgttggaagagcatagtgtttgggctagtgggtttctgacagcccatgggaatgccctgaaactactgtatctgatgtttgttttcgatgaggttccatgttttgttttcttgggaataaattaatatattgttttccaaaaaaaaaaaaaaaaaaaa
